# Supplementary material for: Human fibroblasts facilitate the generation of iPSCs-derived mammary-like organoids
Source: PubMed Central journal article supplement (PMC9330643; doi:10.1186/s13287-022-03023-7), 2022-07-28
Supplement: 13287_2022_3023_MOESM1_ESM.pdf [file 13287_2022_3023_MOESM1_ESM.pdf]

## **Supplemental Information**

**Human fibroblasts facilitate the generation of iPSCs-derived mammary-like organoids**

**Xueqin Dai<sup>1,2</sup>, Xinye Wang<sup>1,2</sup>, Chuanyu Yang<sup>1</sup>, Maobo Huang<sup>3</sup>, Zhongmei zhou<sup>1</sup>, Ying Qu<sup>4</sup>, Xiaojiang Cui<sup>4</sup>, Rong Liu<sup>1,5\*</sup>, Ceshi Chen<sup>1\*</sup>**

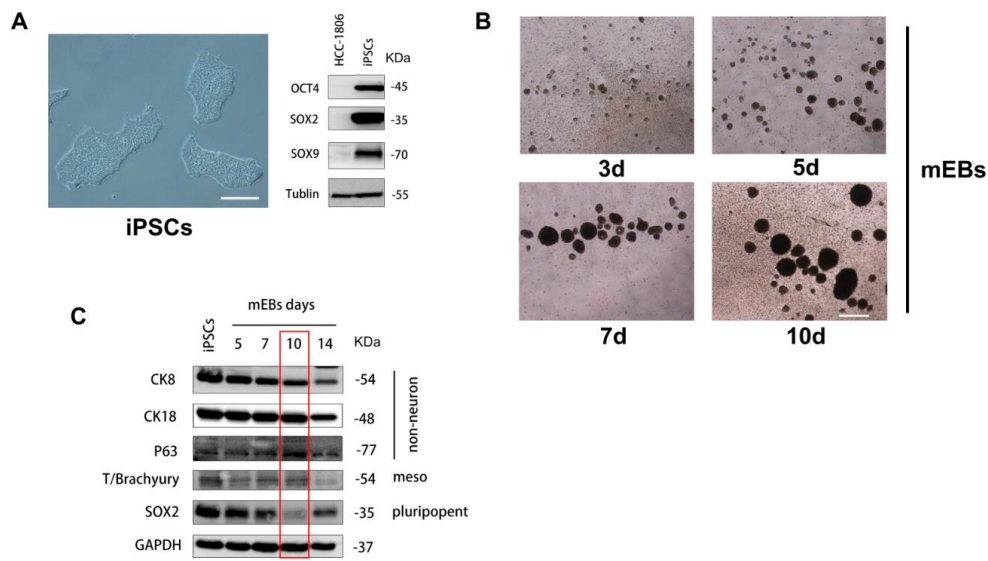

**Figure S1. Differentiation of human iPSCs into mEBs. (Related to Figure 1)**

(A). The morphology (left panel) and expression of pluripotency markers (right panel) of human iPSCs. Bar, 50  $\mu$ m.

(B). The morphology of mEBs after 3, 5, 7 and 10 days of suspension culture (d: days).

(C). The expression profiles of different markers in mEBs after 5, 7, 10 and 14 days' culture.

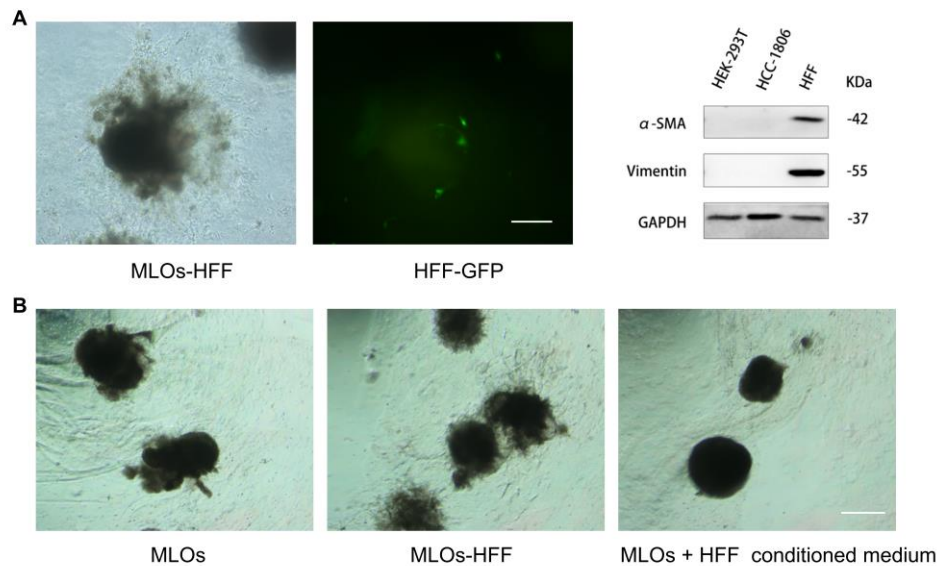

**Figure S2. HFF facilitates MLOs branching. (Related to Figures 1 and 4)**

(A). Representative bright-field images of MLOs-HFF (left panel). HFF expressing green fluorescent protein (GFP) was shown in MLOs (middle panel). HFF expression fibroblast marker  $\alpha$ -SMA ( $\alpha$ -Smooth Muscle Actin) and vimentin were detected (right panel). Bar, 50  $\mu$ m

(B). Representative bright-field images of MLO generated from human iPSCs (left), human iPSCs with HFF (center) and human iPSCs with HFF conditioned medium (right). Bar, 50  $\mu$ m

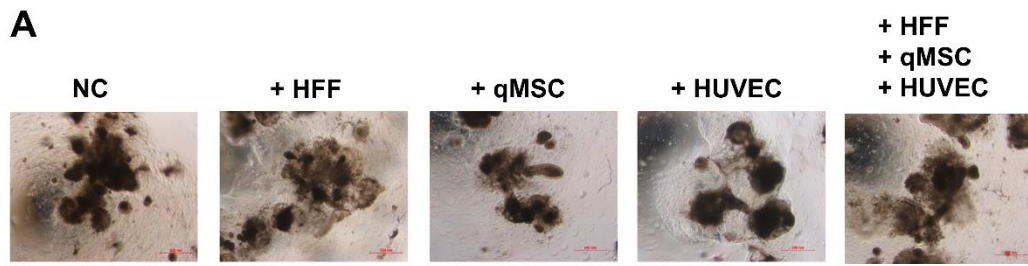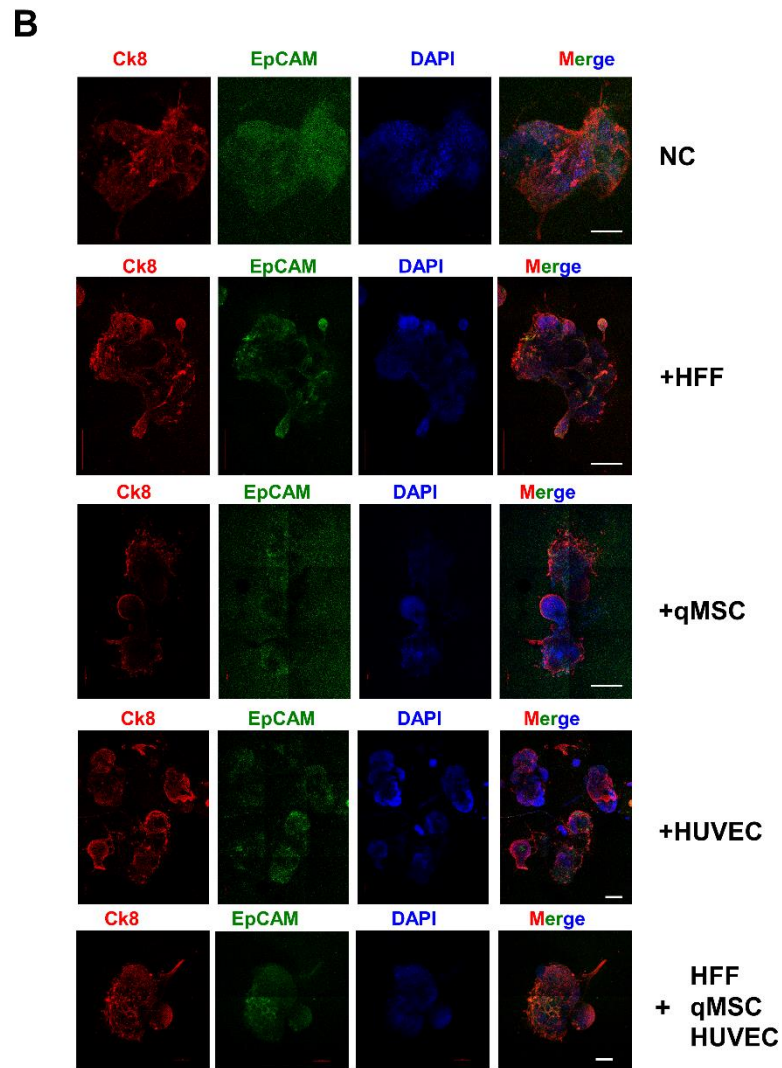

**Fig S3. Co-culture of MLOs with mesenchymal cells.**

(A). Co-culture of mEBs with different mesenchymal cells. Bar, 500nm.

(B). The organoids displayed increased branching structures after adding HFF alone or all of three mesenchymal cell lines. Bar, 100  $\mu$ m

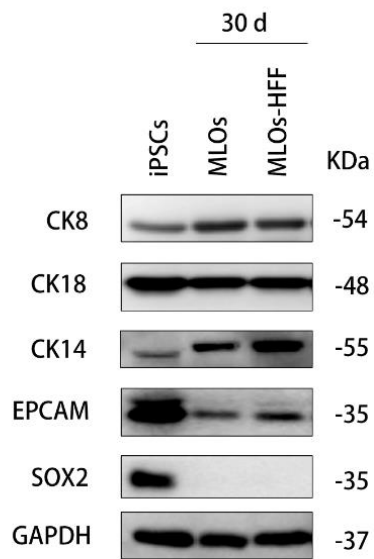

**Figure S4 HFF promotes MLOs differentiation.**

The differential expression profiles of mammary epithelial markers between MLOs and MLOs-HFF after 30 days' culture (d: days). The expression of CK 14 and EPCAM were increased in MLOs-HFF.

## Supplemental Experimental Procedures

### Image analysis

The branching ratio in Figure 4B was counting branched and total organoids number to calculation the branched organoids proportion under the inverted microscope (Nikon ECLIPSE Ti) during the differentiation process. The MLOs and MLOs-HFF in plate pictures were taking by stereoscope (SZX16, Olympus) to measuring the all organoids diameter and then to statistical analysis diameter change at day 10, 17, 25 and 30 (Figure 4D). The IHC duct-like structure results in Figure 4F and 4G were counting the duct in different vision zoom in 200× at microscope (OLYMPUS CX41) then calculate the mean duct number.

### mRNA sequencing and pathway analysis

MLOs total mRNA was extracted using Trizol reagent (Invitrogen, CA, USA) following the manufacturer's procedure. The total RNA quantity and purity were analysis of Bioanalyzer 2100 and RNA 6000 Nano Lab Chip Kit (Agilent, CA, USA) with RIN number >7.0. A total amount of 3 µg RNA per sample was used as input material for RNA-Seq library preparations. Sequencing libraries were generated using NEB Next Ultra II RNA Library Prep Kit for Illumina (NEB, E7760) following manufacturer's recommendations and index codes were added to attribute sequences to each sample. Samples were run on an Illumina Hi-seq instrument. Raw data (raw reads) of fastq format were firstly processed by Fastp software (0.19.3). In this step, clean data (clean reads) were obtained by removing reads containing adapter, reads containing ploy-N and low-quality reads from raw data. At the same time, Q30 and GC content of the clean data were calculated. [The quality control and clean reads results were shown in the Table S3.](#) All the downstream analyses were based on the clean data with high quality. [Reference genome and gene model annotation files were downloaded from the genome website directly. Paired-end clean reads were aligned to the reference genome of Homo sapiens \(RefGene, v20181115\) using STAR V20201. Cufflinks v2.2.1 was used to count the reads numbers mapped to each gene. And then FPKM of each gene was calculated based on the length of the gene and reads count mapped to this gene. Differential expression genes analysis of Day 10, Day 20 and Day 30 was performed using the Cufflinks v2.2.1. The \*P\*-values were adjusted using the Benjamini & Hochberg method. Corrected \*P\*-value of 0.05 and absolute fold change of 1.5 were set as the threshold for significantly differential expression.](#) Gene Ontology (GO) enrichment analysis of differentially

expressed genes was implemented by the clusterProfiler R package (v3.10.0), in which gene length bias was corrected. GO terms with corrected P-value less than 0.05 were considered significantly enriched by differential expressed genes.

### Statistical analysis

Statistical significance for RT-qPCR data (Figures 1C and 3) was determined using one-way ANOVA with a Tukey post-test correction. The two-tailed Student t test was used to compare the gene expression difference between MLOs and MLOs-HFF (Figure 4B, D, E and F). Only differences having a P-value (two-tailed) lower than 0.05 were considered as being significant. Data are presented as the mean  $\pm$  SD (standard deviation). All the Western blots (Figures S1A and C) and RT-qPCR (Figures 1C and 3) have been repeated at least three times. All statistical analyses were performed using GraphPad PRISM version 5 (GraphPad, San Diego, CA, USA).

**Table S1. Antibody list related to Figure 1, S1, 4 and S4**

| Antigen       | Type   | IF    | WB     | IHC   | Manufacturer | Cat. Num.  |
|---------------|--------|-------|--------|-------|--------------|------------|
| Ck18          | Rabbit | 1:250 | 1:2000 | 1:800 | Abcam        | ab181597   |
| Ck8           | Rabbit | 1:100 | 1:1000 | 1:250 | Abcam        | Ab53280    |
| Ck14          | Mouse  | 1:400 | 1:100  | 1:50  | Abcam        | Ab7800     |
| EpCAM         | Mouse  | 1:40  | 1:200  | 1:40  | Abcam        | Ab8666     |
| P63           | Rabbit | 1:100 | 1:500  | -     | GENETEX      | GTX102425  |
| T/Brachyury   | Rabbit | -     | 1:1000 | -     | Novus        | NBP2-24676 |
| OCT4          | Mouse  | -     | 1:1000 | -     | Stem cell    | 60059      |
| SOX2          | Rabbit | -     | 1:1000 | -     | CST          | 3579       |
| SOX9          | Rabbit | -     | 1:500  | -     | Millipore    | AB5535     |
| GAPDH         | Mouse  | -     | 1:1000 | -     | Santa Cruz   | Sc-32233   |
| Tublin        | Mouse  | -     | 1:4000 | -     | Sigma        | T5168      |
| $\alpha$ -SMA | Rabbit | -     | 1:1000 | -     | CST          | 19245      |
| Vimentin      | Rabbit | -     | 1:1000 | -     | CST          | 5741       |

**Table S2. The list of primer in RT-qPCR.**

| Gene     | Primer                                               |
|----------|------------------------------------------------------|
| BMP4     | (F) CCTGAGCCTTCCAGCAAGT (R)ACGACCATCAGCATTTCGGTT     |
| BMPR1A   | (F) AGCCAGCTGGTTTCGAGAAA (R) AGAGCTGAGTCCAGGAACCT    |
| CTNNB1   | (F)TCTTCGTCATCTGACCAGCC (R) GGGATGGTGGGTGTAAGAGC     |
| EGFR     | (F) GCTGCCTCCTGGACTATGTC (R) TGATCTTGACATGCTGCGGT    |
| PRL      | (F) ACACTTCTTCCCTTGCCACC (R) GGCTCATTCCAGGATCGCAA    |
| FGF1     | (F)CTCTACTGTAGCAACGGGGG (R) ATATACACCTCCCCACGCT      |
| IGF1     | (F) GCTGGTGGATGCTCTTCAGT (R) CACTCATCCACGATGCCTGT    |
| BMP7     | (F)CGGATCTCTTCTGCTCGAC (R)GGTTCTTGGGCGTCTTGGAG       |
| MMP14    | (F)TCAACCCAGGACTACCTCCC (R)TCCTTCTCTCGTAGGCAGT       |
| SLIT2    | (F)GTAAGTGCTTGGAGGGCCAT (R)TCCACTGCTGCATTACAGT       |
| SLIT3    | (F)ACTGTCAACTTCGTGGGCAA (R)ATGCCGTTGTCCTTGTCACT      |
| TRPS1    | (F)GGCAGCAGTCTGTCAAGGAA (R)GACGGCATTGTAGCAGCTG       |
| EFNB2    | (F)TTCAGCCCTAACCTCTGGGG (R)AGTTCTGGACGCTTGTGGGA      |
| MET      | (F)AGCTGCCAGTGAAGTGGATG (R)GGTCTGGGCAGTATTTCGGG      |
| WNT5A    | (F)TCCGACATCGAAGGTGGAAC (R)CTCACCGCGTATGTGAAGGC      |
| WNT5B    | (F)CGGACAACGCATCTGTCTTTG (R)GGCTGATGGCGTTGACCA       |
| WNT6     | (F)CGAGAGTGCCAGTTCAGTT (R)ATAGAACAGGCCTGCGTGAC       |
| RSPO3    | (F)AGTCCATGCACGAAGAAGGG (R)GTTGGGGGACACAGGTTACC      |
| KREMEN   | (F)CCCACCTCTGTCTTCAACG (R)AGAGGACTTTGGAGGACCGG       |
| CDC6     | (F)TGCTCTTGATCAGGCAGTTGA (R) TCCAAGAGCCCTGAAAGTGAC   |
| DNA2     | (F)AGACAAATACCAAGGAAGGGACA (R)GCAACATTAAGACGTCGCCA   |
| POLE2    | (F) CGTCCGTTTTCTAGCAGCA (R)CACTGGGCAGACATAAAGAGGT    |
| TIPIN    | (F) GCACCTGTTCTGTACCTCC (R)TATGTGCCAGTGCTCCATG       |
| MAD2     | (F) GCGCGTGCTTTTGTGTG (R)AGTAAAGTTTTAGATGGATAT       |
| BUB1     | (F)AGAGCCCAGGAGACTTCACA (R)GTCGCCTGGGTACACTGTTT      |
| BUBR1    | (F)GGATGCCATTATCACAGGCT (R)TGCTGGTCCTCAGAGGTCTT      |
| AUBORA-A | (F)GCTGGAGAGCTTAAAATTGCAG (R)TTTTGTAGGTCTCTTGGTATGTG |
| SOX2     | (F)CAACCAGAAAAACAGCCCGG (R)TGTGCATCTTGGGGTTCTCC      |
| SOX13    | (F)AAGATCCTGCAAGCCTTCCC (R) CGCGCCTGTTCTCATAGTA      |
| TIF2     | (F)TGTTTCCCTTAACGGCACCT (R)TGACACTTTTTGGGATGCTGA     |
| TGIF2    | (F)TCTAGGTGAGGACGAAGGCC (R) TCTGAGGGGTAGGCGTTGTA     |
| PRA2     | (F) AAGCAGGGAACCTTGGTGGG (R) CTTAGGTCTTGGACAAGCCT    |
| HMGA1    | (F)TCCAAGCAGGAAAAGGACGG (R)CCCCGAGGTCTCTTAGGTGT      |
| PAX6     | (F)TCACAAACACCTACAGCGCT (R) ATAACCTCGCCATTACCG       |

**Table S3. The information of mRNA sequencing data quality control and genome alignment**

| Sample | Q30 reads (%) | Q30 bases (Mb) | Adapter (%) | GC content (%) | Clean reads (%) |
|--------|---------------|----------------|-------------|----------------|-----------------|
| Day 0  | 92.81%        | 5864102524     | 1.37 %      | 48.88 %        | 99%             |
| Day 20 | 92.88%        | 5663194947     | 1.75 %      | 49.15 %        | 98.96%          |
| Day 30 | 93.18%        | 6395957662     | 1.69 %      | 49.97 %        | 98.93%          |
